# Supplementary material for: A first-principles study on Si24 as an anode material for rechargeable batteries
Source: Royal Society of Chemistry journal article supplement (doi:10.1039/c8ra01829d), 2018-01-01
Supplement: c8ra01829d1.pdf [file c8ra01829d1.pdf]

## Electronic Supplementary Information (ESI)

### A First-Principles Study on Si<sub>24</sub> as an Anode Material for Rechargeable Batteries

Yu He,<sup>a,b</sup> Xia Lu,<sup>c</sup> and Duck Young Kim<sup>a,d,\*</sup>

a Center for High Pressure Science and Technology Advanced Research, Shanghai 201203, China Email: duckyoung.kim@hpstar.ac.cn

b Key Laboratory of High-Temperature and High-Pressure Study of the Earth's Interior, Institute of Geochemistry, Chinese Academy of Sciences, Guiyang, Guizhou 550081, China

c Beijing Advanced Innovation Center for Soft Matter Science and Engineering, Beijing University of Chemical Engineering, Beijing 100029, China

d Division of Advanced Nuclear Engineering, POSTECH, South Korea

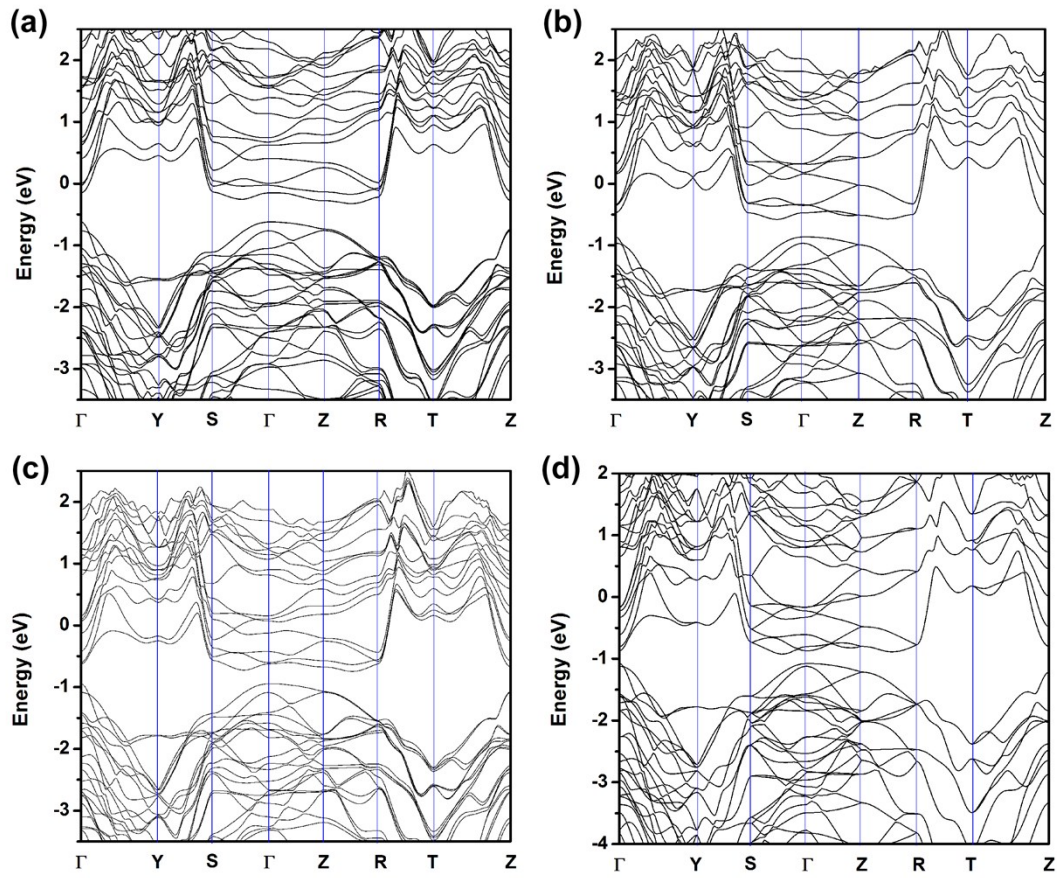

**Fig. S1** Electronic band structures of (a)  $\text{LiSi}_{24}$ , (b)  $\text{Li}_2\text{Si}_{24}$ , (c)  $\text{Li}_3\text{Si}_{24}$  and (d)  $\text{Li}_4\text{Si}_{24}$ .

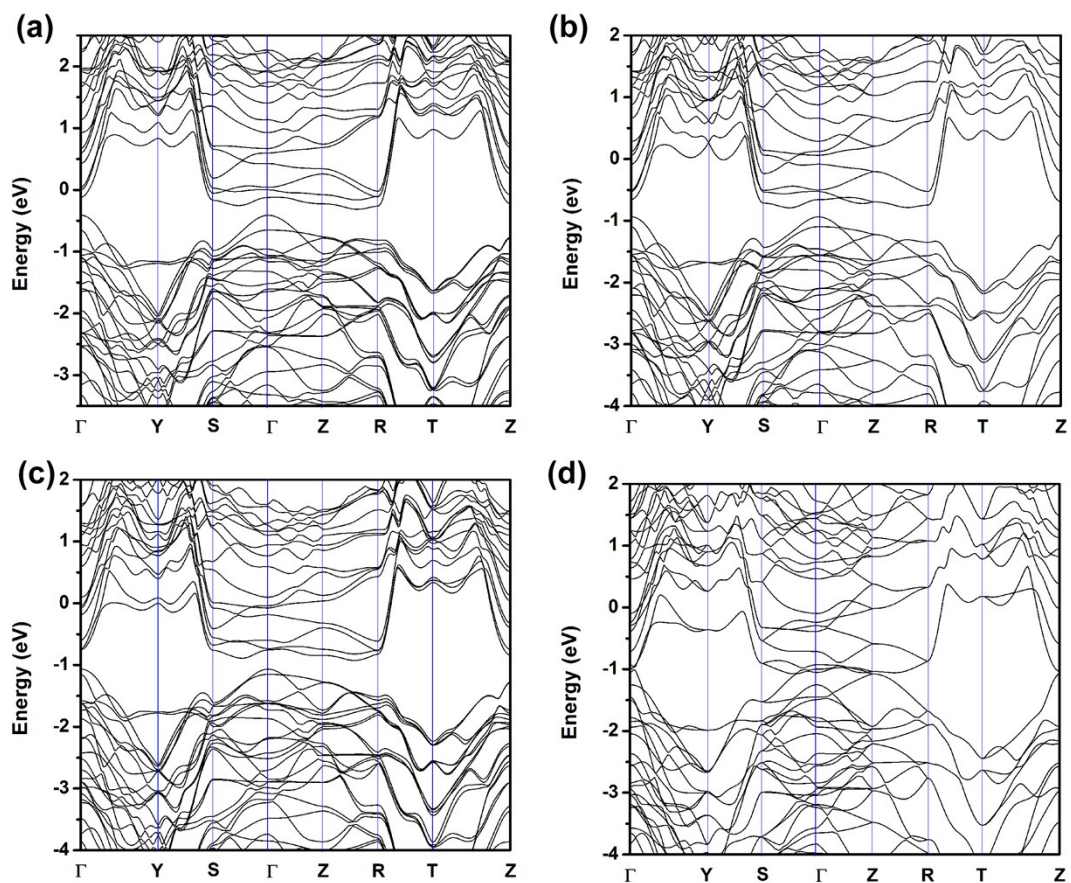

**Fig. S2** Electronic band structures of (a)  $\text{NaSi}_{24}$ , (b)  $\text{Na}_2\text{Si}_{24}$ , (c)  $\text{Na}_3\text{Si}_{24}$  and (d)  $\text{Na}_4\text{Si}_{24}$ .

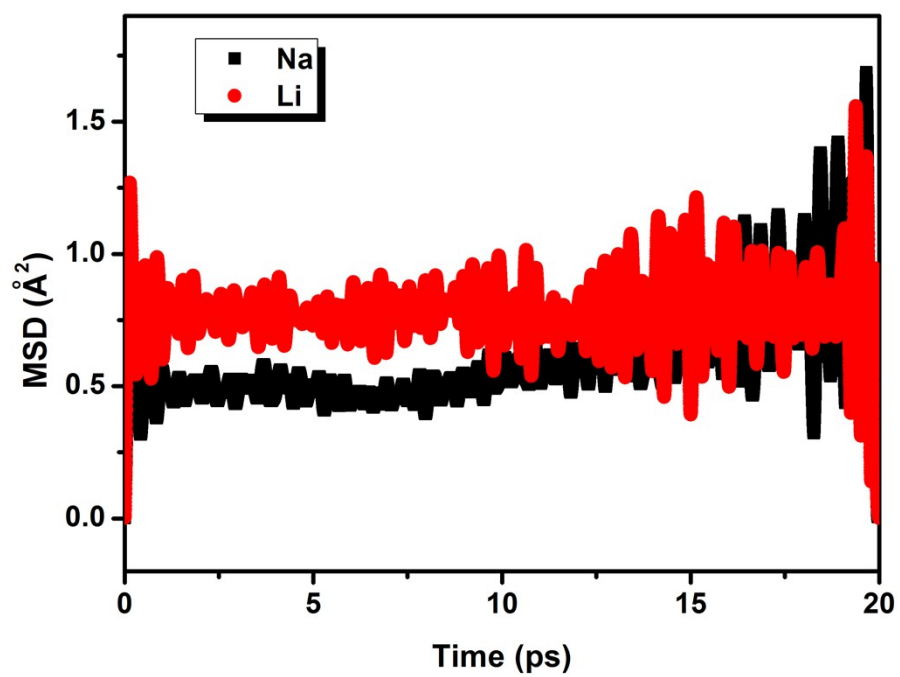

**Fig. S3** MSD of Na/Li ions in  $\text{Na}_4\text{Si}_{24}$  and  $\text{Li}_4\text{Si}_{24}$  at temperature of 1500 K and 1000 K respectively.

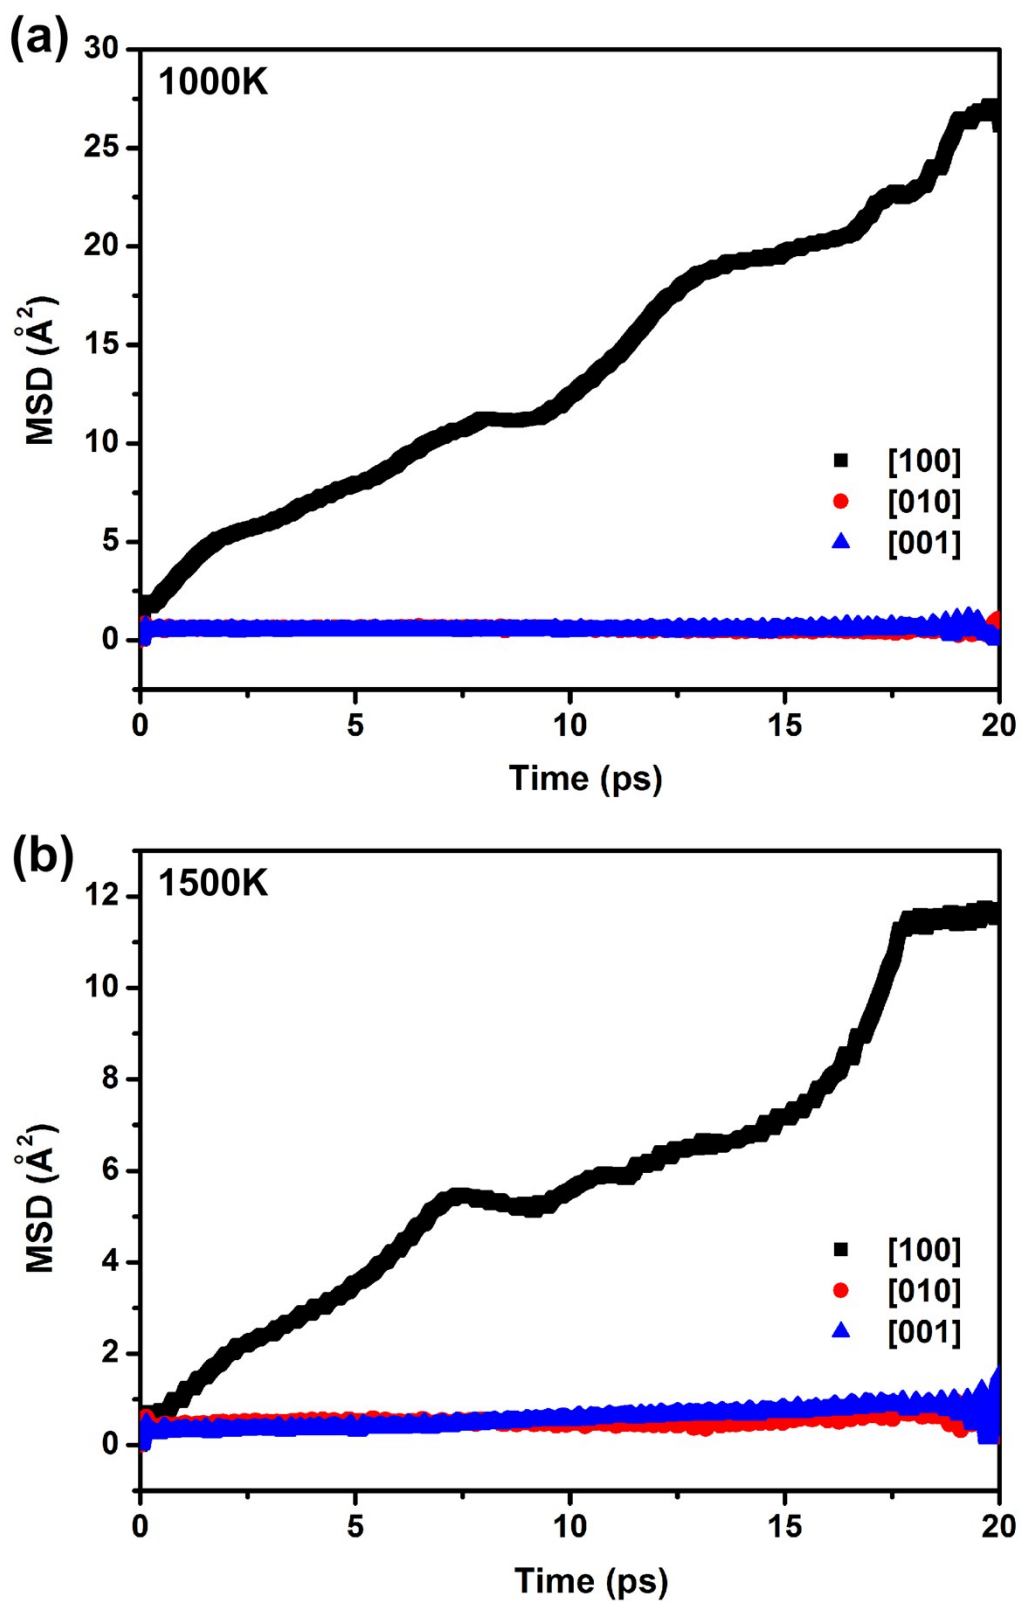

**Fig. S4** Mean square displacement (MSD) of (a)  $\text{Li}^+$  at 1000 K and (b)  $\text{Na}^+$  at 1500 K in  $\text{Li}_{2.66}\text{Si}_{24}$  and  $\text{Na}_{2.66}\text{Si}_{24}$  along different lattice directions.

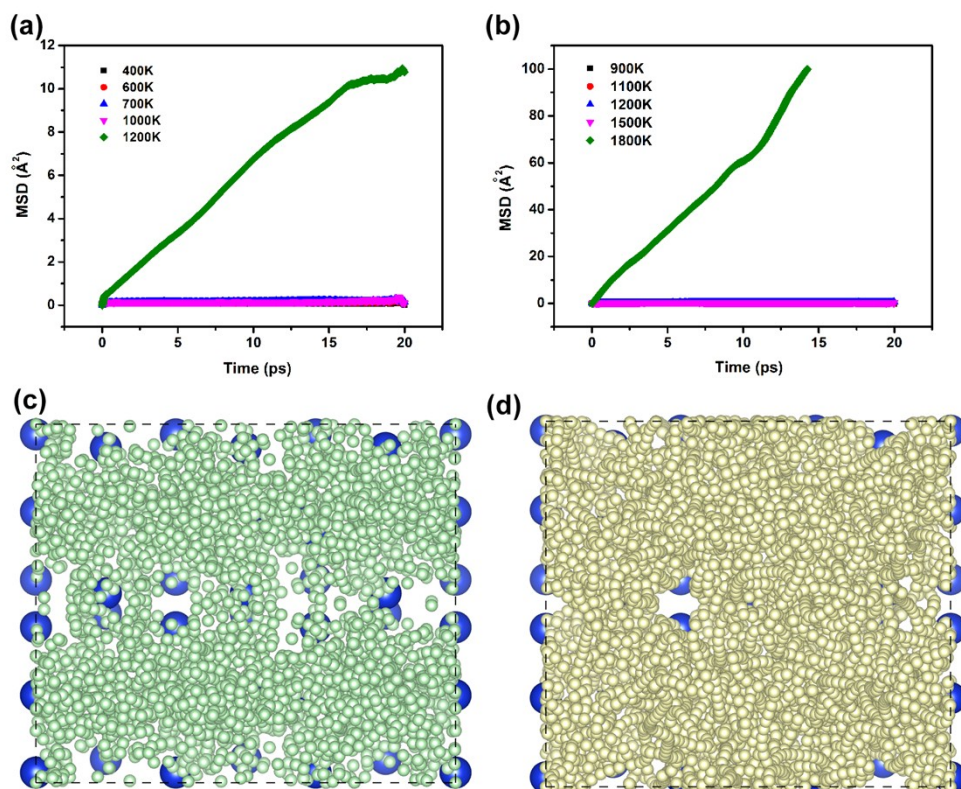

**Fig. S5** Mean square displacement (MSD) of Li/Na ions in (a)  $\text{Li}_{2.66}\text{Si}_{24}$  and (b)  $\text{Na}_{2.66}\text{Si}_{24}$  at different temperature. Trajectories of (c)  $\text{Li}^+$  at 1200 K in  $\text{Li}_{2.66}\text{Si}_{24}$  and (d)  $\text{Na}^+$  at 1800 K in  $\text{Na}_{2.66}\text{Si}_{24}$ .

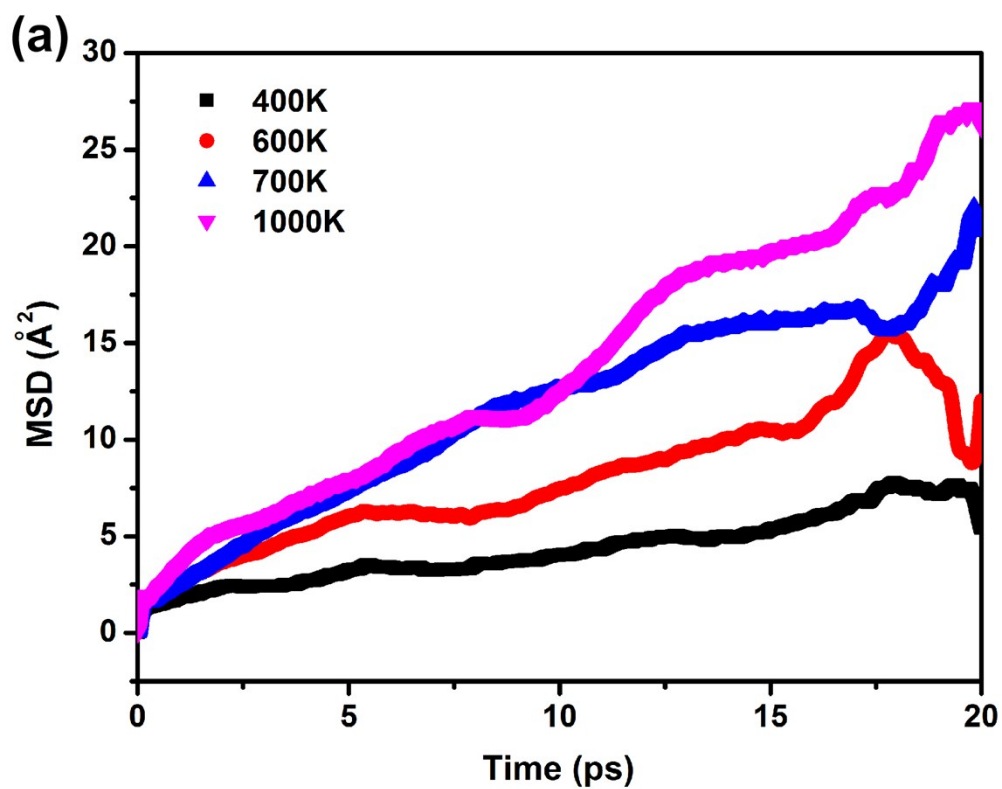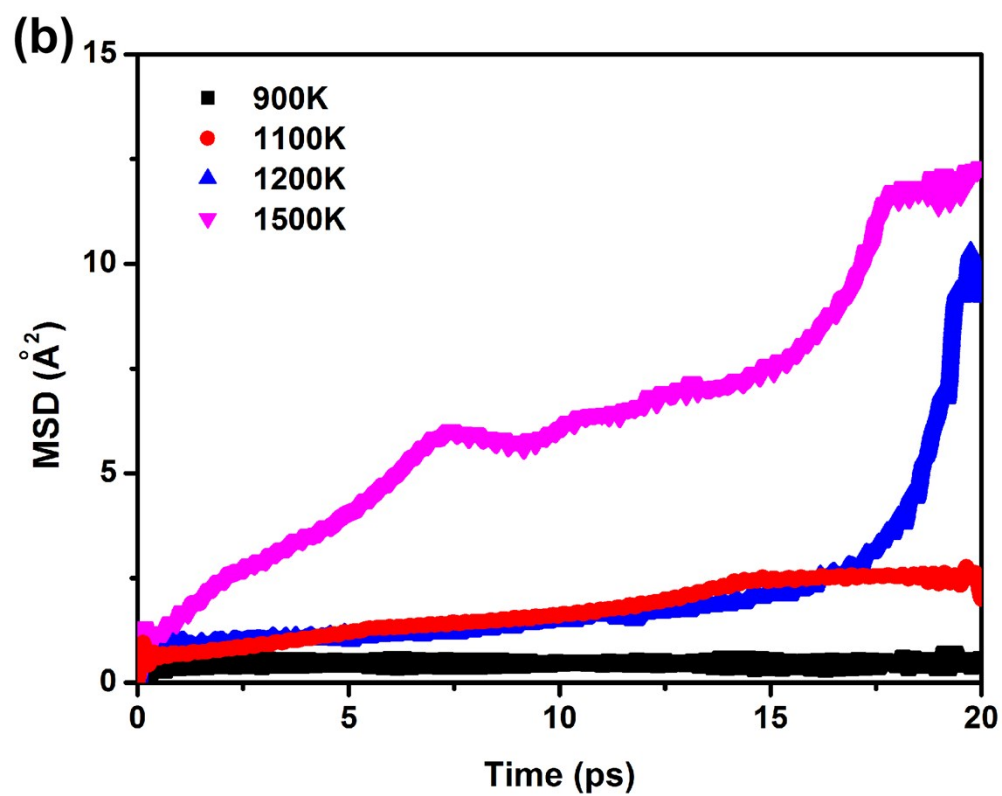

**Fig. S6** Mean square displacement (MSD) of (a)  $\text{Li}^+$  in  $\text{Li}_{2.66}\text{Si}_{24}$  and (b)  $\text{Na}^+$  in  $\text{Na}_{2.66}\text{Si}_{24}$  at different temperatures.

**Table S1** The comparison of volume per Si atom and theoretical capacity of Si and various Li-Si alloy.

| Compound and crystal structure           | Volume per Si atom ( $\text{\AA}^3$ ) | Theoretic capacity (mAh/g) |
|------------------------------------------|---------------------------------------|----------------------------|
| Si cubic                                 | 19.6                                  | 0                          |
| $\text{Li}_4\text{Si}_{24}$ orthorhombic | 22.0                                  | 159                        |
| LiSi tetragonal                          | 31.4                                  | 954                        |
| $\text{Li}_{12}\text{Si}_7$ orthorhombic | 43.5                                  | 1635                       |
| $\text{Li}_2\text{Si}$ monoclinic        | 51.5                                  | 1900                       |
| $\text{Li}_{13}\text{Si}_4$ orthorhombic | 67.3                                  | 3100                       |
| $\text{Li}_{15}\text{Si}_4$ tetragonal   | 76.4                                  | 3590                       |
| $\text{Li}_{22}\text{Si}_5$ cubic        | 82.4                                  | 4200                       |
